# Supplementary material for: Recombinant Expression in Pichia pastoris System of Three Potent Kv1.3 Channel Blockers: Vm24, Anuroctoxin, and Ts6
Source: MDPI journal article supplement (doi:10.3390/jof8111215), 2022-11-17
Supplement: s1 [file s1]

Article

# Recombinant expression in *Pichia pastoris* system of three potent Kv1.3 channel blockers: Vm24, Anuroctoxin, and Ts6.

Jesús Borrego<sup>1</sup>, Muhammad Umair Naseem<sup>1</sup>, Al Nasar Ahmed Sehgal<sup>1</sup>, Panda Lipsa Rani<sup>1</sup>, Kashmala Shakeel<sup>1</sup>, Attila Gáspár<sup>2</sup>, Cynthia Nagy<sup>2</sup>, Zoltan Varga<sup>1</sup> and Gyorgy Panyi<sup>1,\*</sup>.

<sup>1</sup> Department of Biophysics and Cell Biology, Faculty of Medicine, University of Debrecen, Debrecen, Hungary.

<sup>2</sup> Department of Inorganic and Analytical Chemistry, Faculty of Science and Technology, Institute of Chemistry, University of Debrecen, Debrecen, Hungary.

\* Correspondence: panyi@med.unideb.hu (G.P.); Tel.: (+36)(52) 258-603

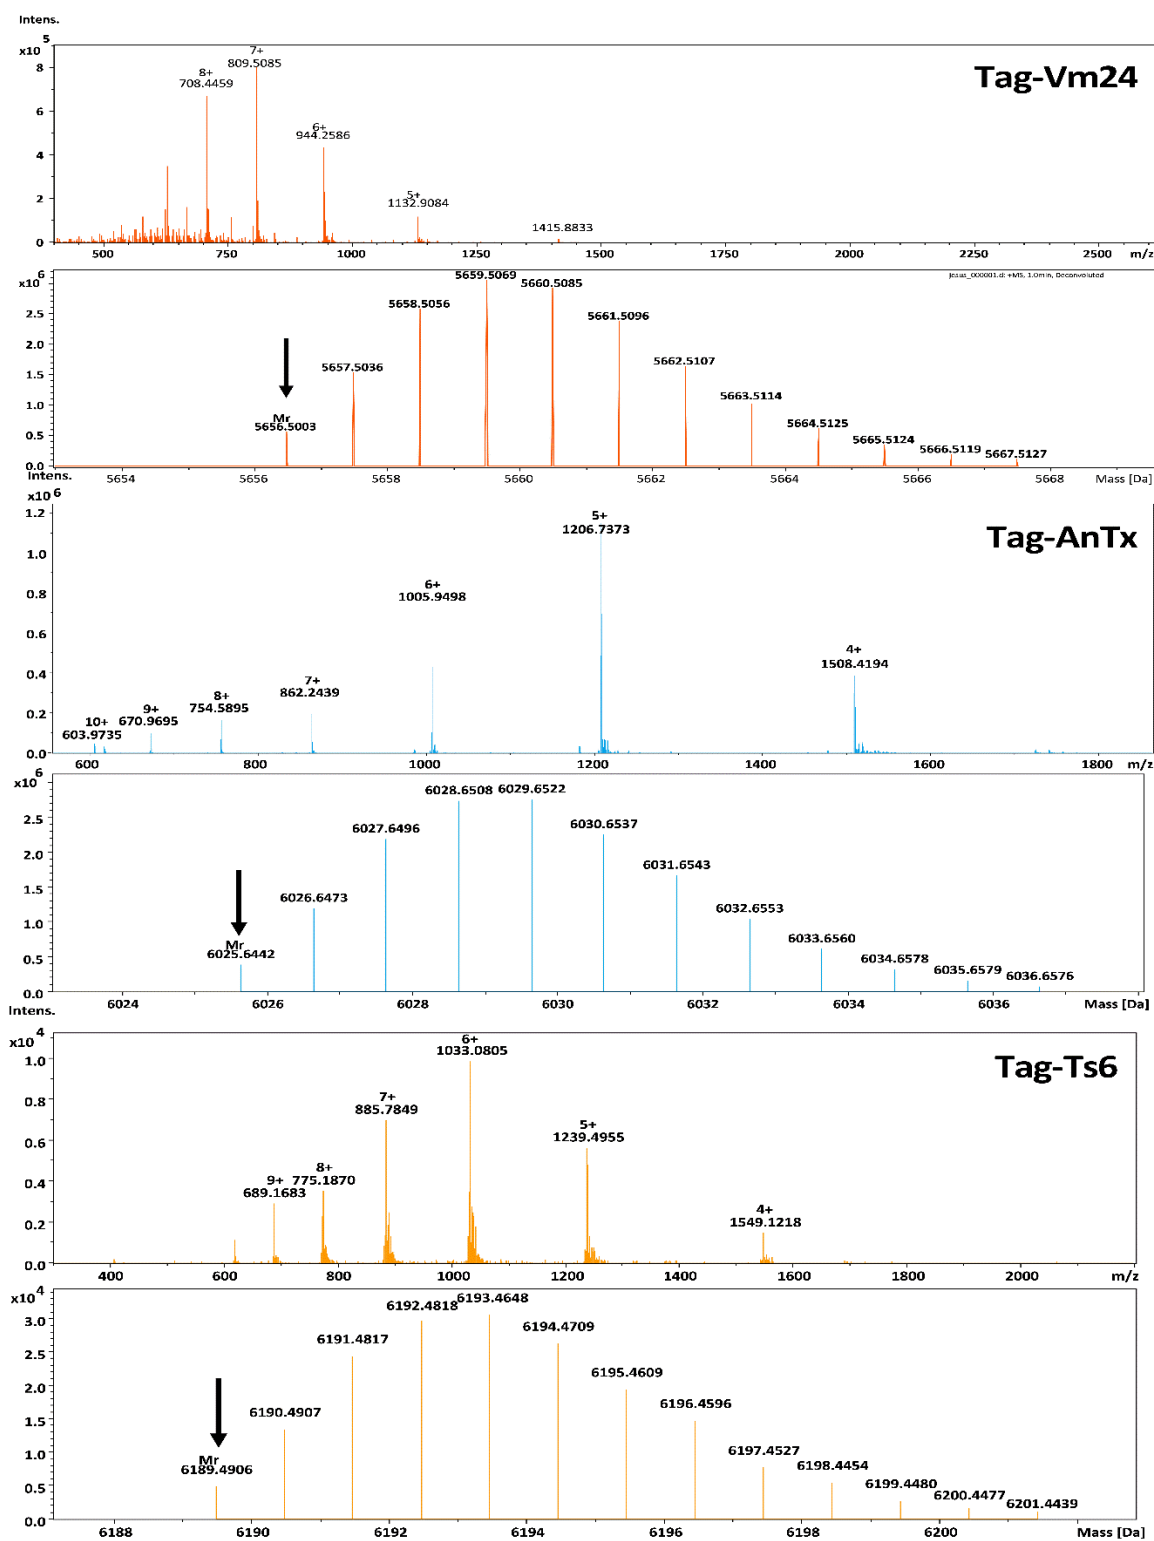

**Figure S1.** Mass spectrometry analysis of the tagged peptides. The raw (top) and deconvoluted (bottom) spectrums are shown for each peptide. Deconvoluted spectrum shows a reconstructed, neutral spectrum. Black arrow points to the monoisotopic molecular mass.

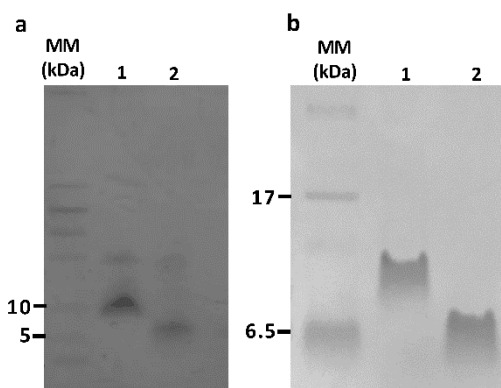

**Figure S2.** Tricine SDS-PAGE analysis of tagged and untagged Ts6 and AnTx. a) Recombinant Ts6. MM: Molecular marker (kDa), line 1: Tag-Ts6, and line 2: Untag-Ts6. b) Recombinant AnTx. MM: Molecular marker (kDa), line 1: Tag-AnTx, and line 2: Untag-AnTx.

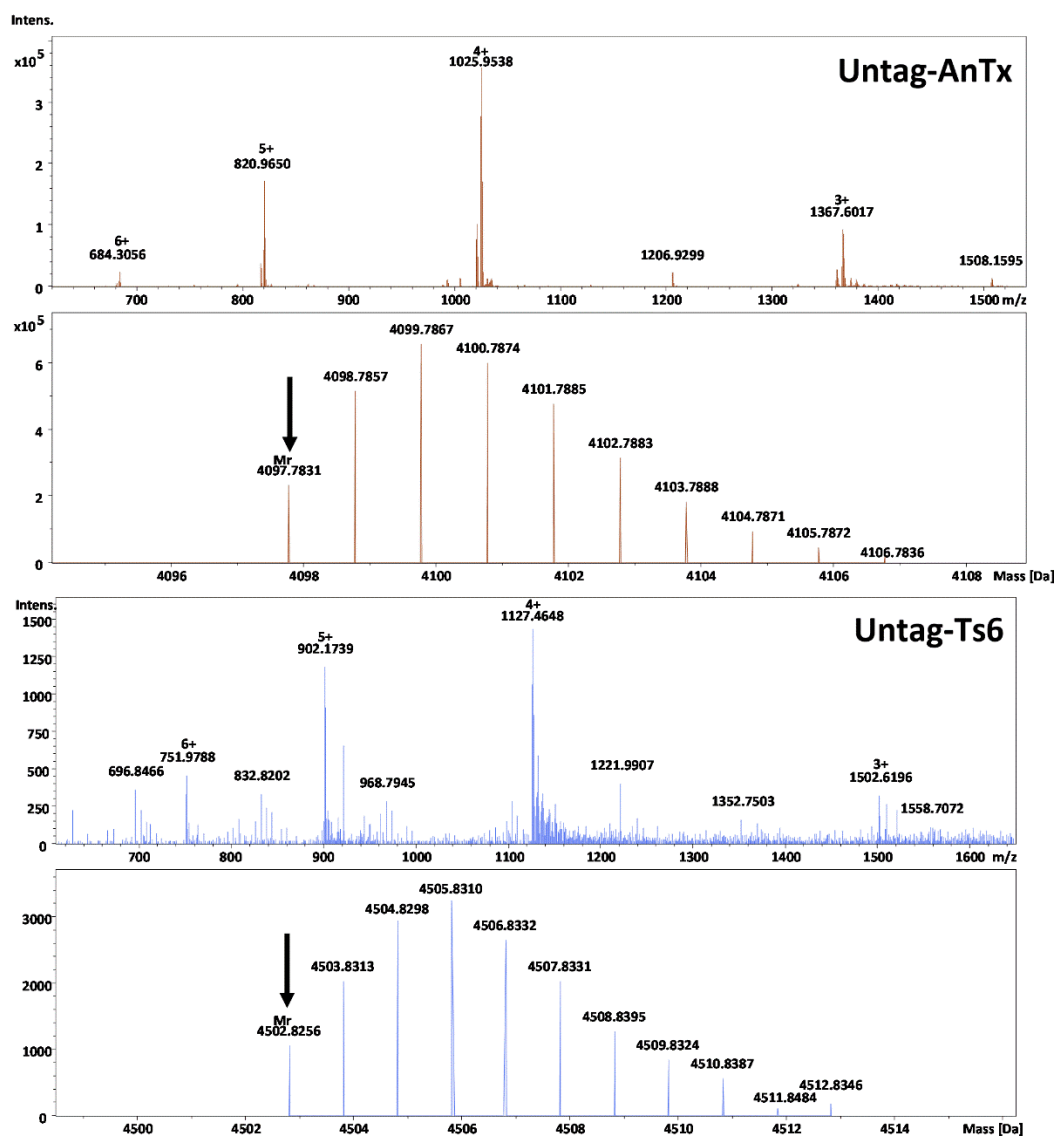

**Figure S3.** Mass spectrometry analysis of the untagged peptides. The raw (top) and deconvoluted (bottom) spectrums are shown for each peptide. Deconvoluted spectrum shows a reconstructed, neutral spectrum. Black arrow points to the monoisotopic molecular mass.
